# Supplementary material
Source: Springer Nature journal article supplement (https://www.springermedizin.de/resource/supplementary/12960_2009_171_MOESM2_ESM.pdf/9570564)

Physician Population Ratio

Nurse Population Ratio

Dentist Population Ratio

Pharmacist Population Ratio

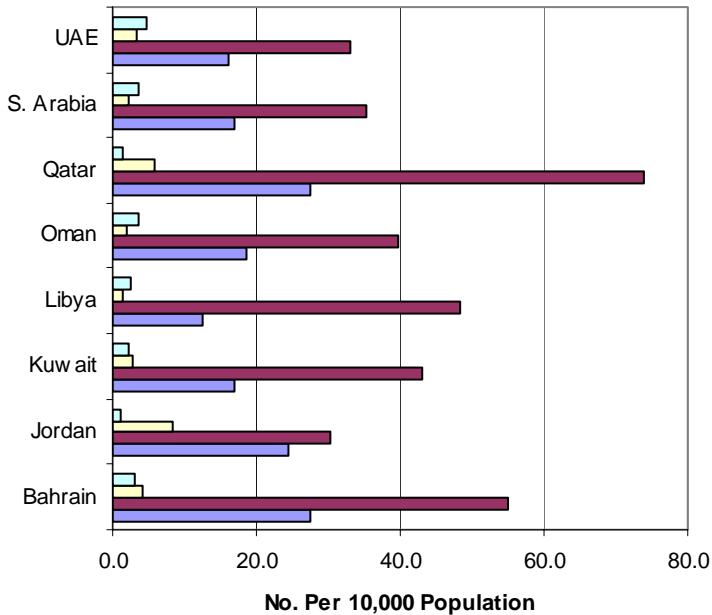

Supplement: MOESM2 [file 9570564]
